# Supplementary material for: Phosphonium ionic liquids based on bulky phosphines: synthesis, structure and properties
Source: Royal Society of Chemistry journal article supplement (doi:10.1039/b924636c), 2010-01-01
Supplement: b924636c.pdf [file b924636c.pdf]

**Table 1S** Scaling factors for the force fields of the ion pair.

| scaling factor |       | value               |
|----------------|-------|---------------------|
| stretch        | C-C   | 0.9207 <sup>a</sup> |
| stretch        | C-H   | 0.889 <sup>b</sup>  |
| stretch        | C-P   | 1.040 <sup>c</sup>  |
| stretch        | B-F   | 1.00 <sup>d</sup>   |
| bend           | C-C-C | 1.0144 <sup>a</sup> |
| bend           | C-C-H | 0.95 <sup>a</sup>   |
| bend           | H-C-H | 0.9016 <sup>a</sup> |
| bend           | C-P-C | 1.070 <sup>c</sup>  |
| bend           | C-C-P | 1.0144 <sup>a</sup> |
| bend           | F-B-F | 1.0144 <sup>d</sup> |
| torsion        | all   | 0.9523 <sup>a</sup> |

<sup>a</sup> J.Baker, A.Jarzecki, P.Pulay, *J.Phys.Chem.A*, **1998**, *102*, 1412.

<sup>b</sup> S.A.Katsyuba, J.Grunenberg, R.Schmutzler, *J.Mol.Struct.*, **2001**, *559*, 315-320.

<sup>c</sup> S.A.Katsyuba, E.E.Vandyukova. *Chem. Phys. Lett.*, **2003**, *377*, No. 5-6, 658-662.

<sup>d</sup> S.A.Katsyuba, E.E.Zvereva, P.J.Dyson, A.Vidiš, *J. Phys. Chem. A*, **2007**, *111*, 352.



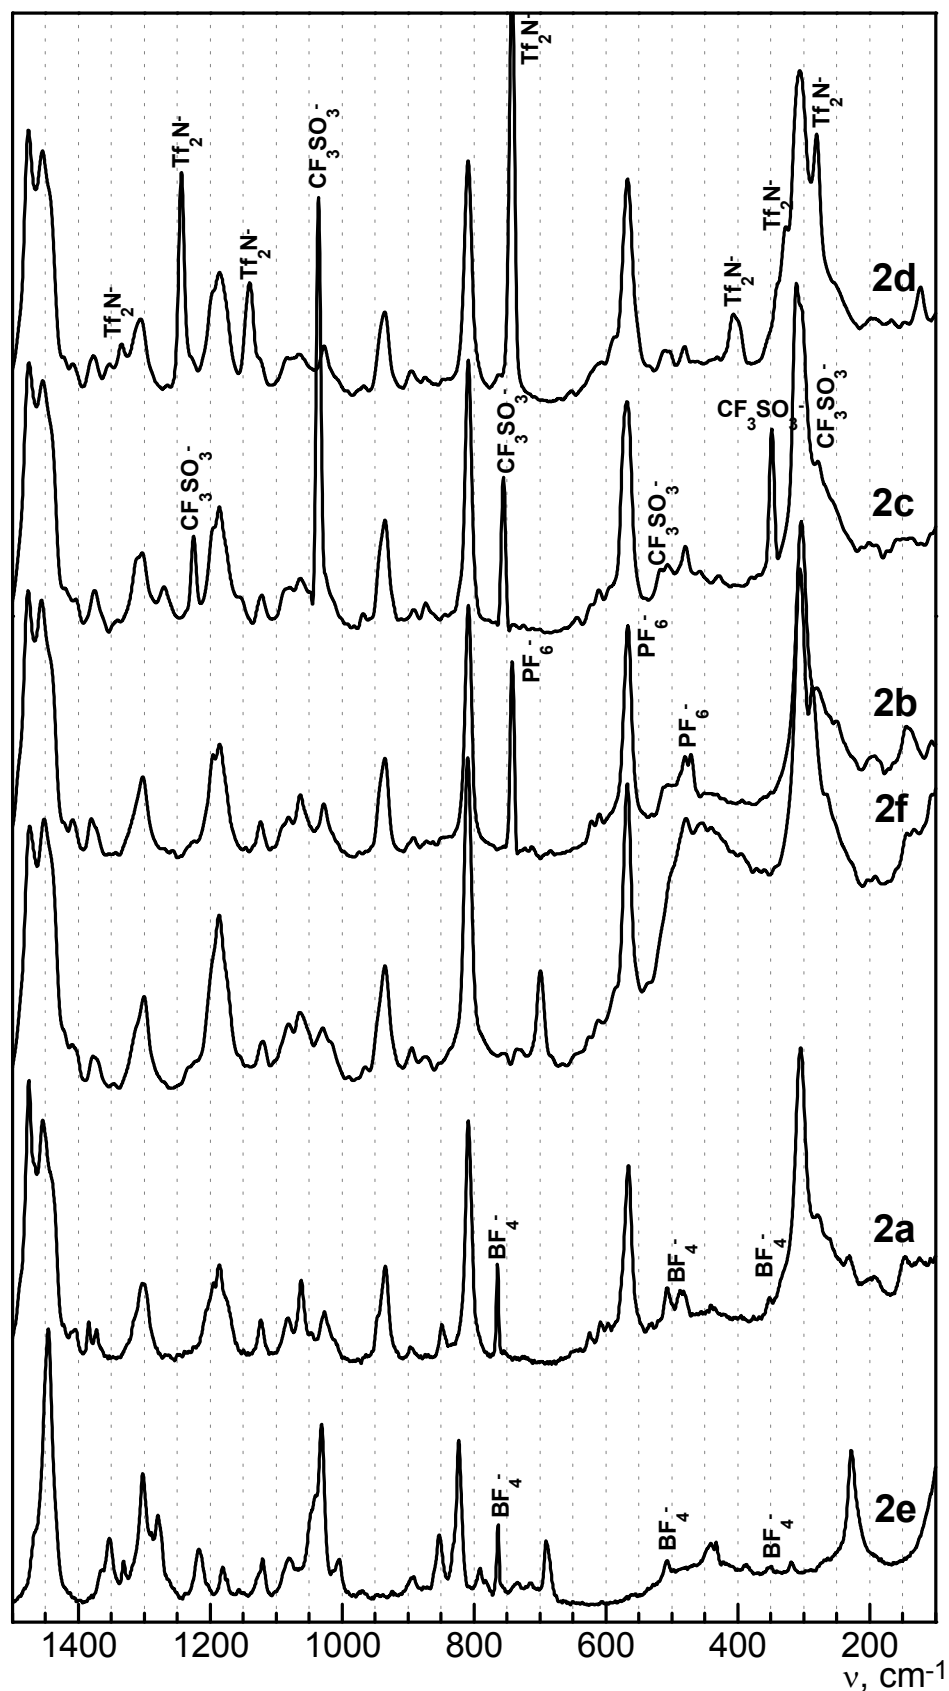

Fig.1S. Raman spectra of the ionic liquids studied. The bands of different anions are marked.



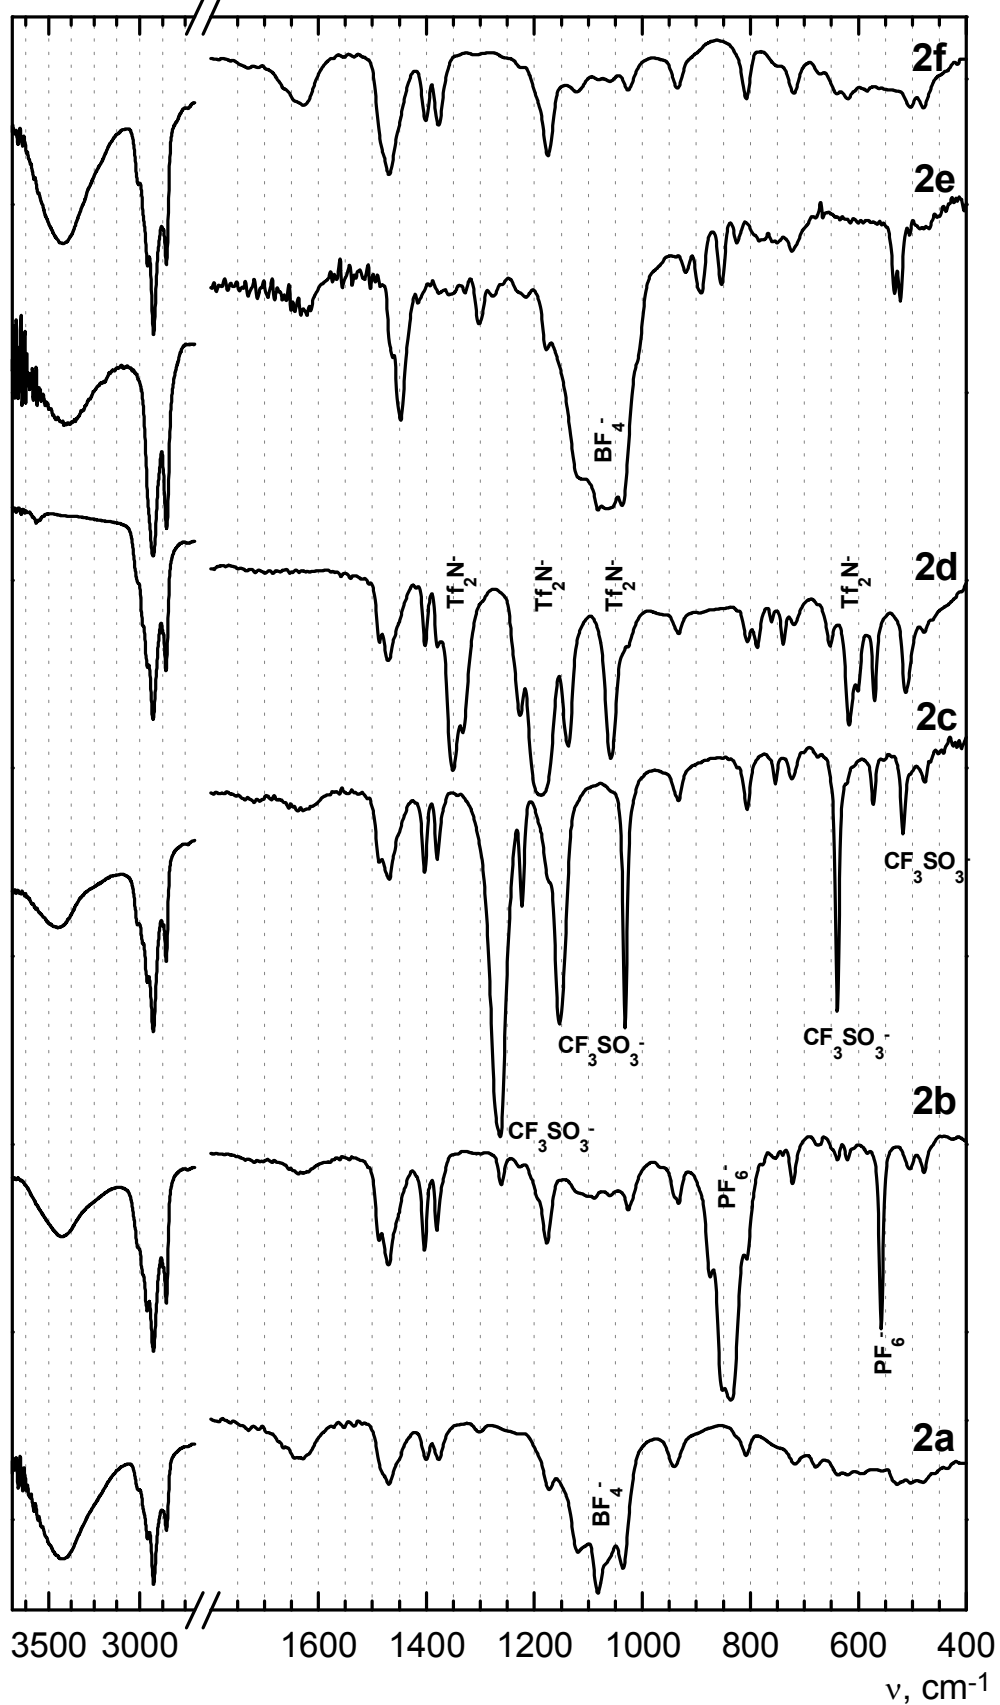

Fig.2S. IR spectra of the ionic liquids studied. The bands of different anions are marked.
